# Supplementary material for: Low-Dose Stevia (Rebaudioside A) Consumption Perturbs Gut Microbiota and the Mesolimbic Dopamine Reward System
Source: PubMed Central journal article supplement (PMC6627124; doi:10.3390/nu11061248), 2019-05-31
Supplement: nutrients-11-01248-s001.pdf [file nutrients-11-01248-s001.pdf]

## Supplementary Material

**Table S1:** Composition of experimental diets from age 3- to 8-weeks

| <i>(g/kg)</i>       | <b>CTR<sup>1</sup></b> | <b>STV<sup>1</sup></b> | <b>PRE<sup>1</sup></b> | <b>STV+PRE<sup>1</sup></b> |
|---------------------|------------------------|------------------------|------------------------|----------------------------|
| Casein              | 200                    | 200                    | 180                    | 180                        |
| Dyetrose            | 132                    | 132                    | 118.8                  | 118.8                      |
| Cornstarch          | 397.486                | 397.486                | 357.737                | 357.737                    |
| Sucrose             | 100                    | 100                    | 90                     | 90                         |
| Cellulose           | 50                     | 50                     | 45                     | 45                         |
| Soybean Oil         | 70                     | 70                     | 63                     | 63                         |
| t-Butylhydroquinone | 0.014                  | 0.014                  | 0.0126                 | 0.0126                     |
| Mineral Mix         | 35                     | 35                     | 31.5                   | 31.5                       |
| Vitamin Mix         | 10                     | 10                     | 9                      | 9                          |
| L-Cystine           | 3                      | 3                      | 2.7                    | 2.7                        |
| Choline Bitartrate  | 2.5                    | 2.5                    | 2.25                   | 2.25                       |
| Prebiotic           | 0                      | 0                      | 100                    | 100                        |

<sup>1</sup>Based on AIN93-G diet (Dyets, Inc., Bethlehem, PA). Prebiotic = oligofructose-enriched inulin, Synergy1 (Beneo, Mannheim, Germany). CTR, control; STV, RebA; PRE, prebiotic; STV+PRE, RebA + prebiotic.

**Table S2:** Composition of experimental diets from age 8- to 12-weeks<sup>1</sup>

| <i>(g/kg)</i>       | <b>CTR<sup>1</sup></b> | <b>STV<sup>1</sup></b> | <b>PRE<sup>1</sup></b> | <b>STV+PRE<sup>1</sup></b> |
|---------------------|------------------------|------------------------|------------------------|----------------------------|
| Casein              | 140                    | 140                    | 126                    | 126                        |
| Dyetrose            | 155                    | 155                    | 139.5                  | 139.5                      |
| Cornstarch          | 465.692                | 465.692                | 419.123                | 419.123                    |
| Sucrose             | 100                    | 100                    | 90                     | 90                         |
| Cellulose           | 50                     | 50                     | 45                     | 45                         |
| Soybean Oil         | 40                     | 40                     | 36                     | 36                         |
| t-Butylhydroquinone | 0.008                  | 0.008                  | 0.0072                 | 0.0072                     |
| Mineral Mix         | 35                     | 35                     | 31.5                   | 31.5                       |
| Vitamin Mix         | 10                     | 10                     | 9                      | 9                          |
| L-Cystine           | 1.8                    | 1.8                    | 1.62                   | 1.62                       |
| Choline Bitartrate  | 2.5                    | 2.5                    | 2.25                   | 2.25                       |
| Prebiotic           | 0                      | 0                      | 100                    | 100                        |

<sup>1</sup>Based on AIN93-G diet (Dyets, Inc., Bethlehem, PA). Prebiotic = oligofructose-enriched inulin, Synergy1 (Beneo, Mannheim, Germany). CTR, control; STV, RebA; PRE, prebiotic; STV+PRE, RebA + prebiotic.

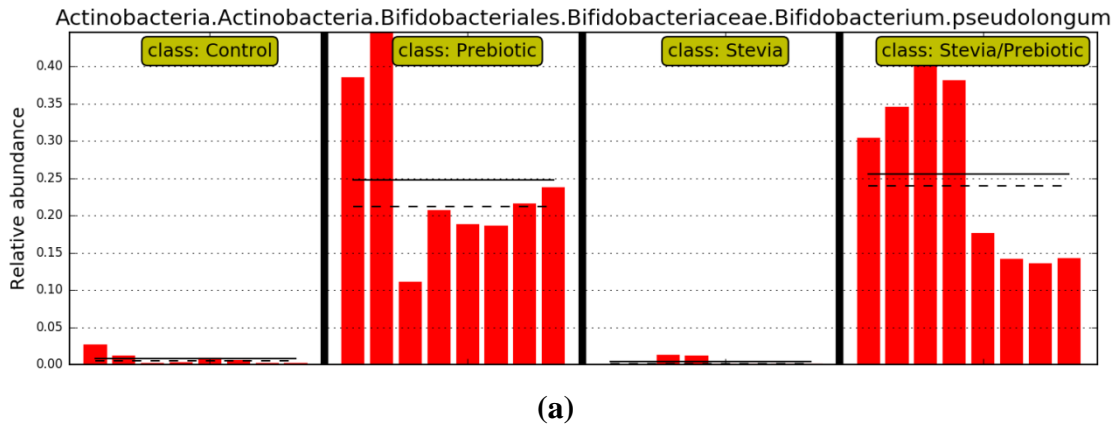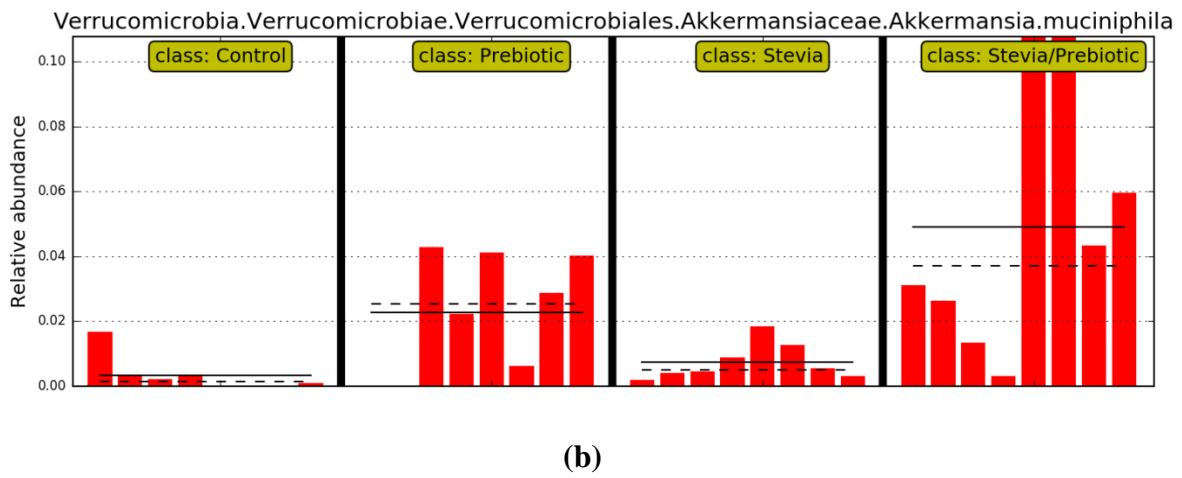

**Figure S1.** Relative abundance of (A) *Bifidobacterium pseudolongum* and (B) *Akkermansia muciniphila* in control, prebiotic, stevia, and stevia+prebiotic consuming rats.
